# Supplementary material
Source: ML conference proceedings conference paper supplement (https://openreview.net/forum?id=F02H1zNl213)
Supplement: supplementary_material [file attachment]

## A Proof of Lemma 1

*Proof (Lemma 1).*

$$\begin{aligned}
\hat{L}(q; \mathcal{S}) - \hat{L}(q'; \mathcal{S}) &= \hat{\mathbb{E}}_{\mathcal{S}}[\log q'(x) - \log q(x)] \\
&= \hat{\mathbb{E}}_{\mathcal{S}}[-af(x) - \log Z_{q'}] \\
&= a(\mathbb{E}_q[f(x)] - \hat{\mathbb{E}}_{\mathcal{S}}[f(x)]) - a\mathbb{E}_q[f(x)] - \log Z_{q'} \\
&= a\hat{\alpha}(f) - a\mathbb{E}_q[f(x)] - \log Z_{q'}
\end{aligned} \tag{4}$$

Since  $\hat{\alpha}(f) \geq a$  by assumption, it remains to show  $a\mathbb{E}_q[f(x)] + \log Z_{q'} \leq a^2/2$ . Using the bound  $\log r \leq r - 1$  for any  $r > 0$ , we get that,

$$\begin{aligned}
a\mathbb{E}_q[f(x)] + \log Z_{q'} &\leq a\mathbb{E}_q[f(x)] + Z_{q'} - 1 \\
&= a\mathbb{E}_q[f(x)] + \mathbb{E}_q[e^{-af(x)}] - 1 \\
&= \mathbb{E}_q[af(x) + e^{-af(x)} - 1] \\
&\leq \mathbb{E}_q[(af(x))^2/2],
\end{aligned}$$

where we have used the fact that  $Z_{q'} = \mathbb{E}_q[e^{-af(x)}]$  and, to get to the last line we use  $e^{-r} + r - 1 \leq r^2/2$  for  $r \geq 0$  by Taylor expansion. Since  $f(x) \in [0, 1]$ , the last quantity is at most  $a^2/2$ , which together with (4), gives  $\hat{L}(q; \mathcal{S}) - \hat{L}(q'; \mathcal{S}) \geq a^2/2$ .  $\square$

## B Proof of Lemma 2

*Proof (Lemma 2).* Let  $g(x) = \log q(x) - \log q'(x)$ . By Jensen's inequality,

$$\begin{aligned}
\mathbb{E}_q[g(x)] - \hat{\mathbb{E}}_{\mathcal{S}}[g(x)] &= -\mathbb{E}_q\left[\log \frac{q'(x)}{q(x)}\right] - \hat{\mathbb{E}}_{\mathcal{S}}[g(x)] \\
&\geq -\log \mathbb{E}_q\left[\frac{q'(x)}{q(x)}\right] - \hat{\mathbb{E}}_{\mathcal{S}}[g(x)] \\
&= -\log(1) - \hat{\mathbb{E}}_{\mathcal{S}}[g(x)] \\
&= \mathbb{E}_{\mathcal{S}}[\log q'(x)] - \hat{\mathbb{E}}_{\mathcal{S}}[\log q(x)] \\
&= \hat{L}(q; \mathcal{S}) - \hat{L}(q'; \mathcal{S})
\end{aligned}$$

Since  $f(x) = \frac{1}{2 \log C}(g(x) + \log C)$ , the training advantage of  $f$  is that of  $g$  scaled by a factor of  $\frac{1}{2 \log C}$ . Finally, it is straightforward to verify that  $f(x) \in [0, 1]$  by our assumptions on the ratio between  $q$  and  $q'$ .  $\square$

## C Proof of Lemma 3

*Proof.* We proceed analogously as in the proof of Lemma 1. We first note that

$$\hat{L}(q; \mathcal{S}) = -\hat{\mathbb{E}}_{\mathcal{S}} \left[ \log \prod_{i=1}^N q(x_i | x_1, \dots, x_{i-1}) \right] = -\sum_{i=1}^N \hat{\mathbb{E}}_{\mathcal{S}} \log q(x_i | x_1, \dots, x_{i-1}),$$

and

$$\begin{aligned}
\hat{L}(q'; \mathcal{S}) &= -\hat{\mathbb{E}}_{\mathcal{S}} \left[ \log \prod_{i=1}^N q'(x_i | x_1, \dots, x_{i-1}) \right] \\
&= \sum_{i=1}^N -\hat{\mathbb{E}}_{\mathcal{S}} \log q(x_i | x_1, \dots, x_{i-1}) + bg(x_1, \dots, x_i) + \log Z_{q'}(x_1, \dots, x_{i-1})
\end{aligned}$$

Let us use the short-hand notation  $x_{1:i} \triangleq (x_1, \dots, x_i)$ . Subtracting the two equalities above we obtain

$$\hat{L}(q; \mathcal{S}) - \hat{L}(q'; \mathcal{S}) = \sum_{i=1}^N \hat{\mathbb{E}}_{\mathcal{S}} [-bg(x_{1:i}) - \log Z_{q'}(x_{1:i-1})],$$

which, after adding and subtracting  $\hat{\mathbb{E}}_{\mathcal{S}} \mathbb{E}_{w \sim q(w|x_{1:i-1})} g(x_{1:i-1}, w)$  and rearranging terms, yields

$$\hat{L}(q; \mathcal{S}) - \hat{L}(q'; \mathcal{S}) = b \left[ \sum_{i=1}^N \hat{\mathbb{E}}_{\mathcal{S}} \left( \mathbb{E}_{w \sim q(w|x_{1:i})} g(x_{1:i-1}, w) - g(x_{1:i}) \right) \right] \quad (5)$$

$$- \sum_{i=1}^N \hat{\mathbb{E}}_{\mathcal{S}} [\log Z_{q'}(x_{1:i-1}) - b \mathbb{E}_{w \sim q(w|x_{1:i-1})} g(x_{1:i-1}, w)] \quad (6)$$

$$= bN \hat{\beta}(g) - \sum_{i=1}^N \hat{\mathbb{E}}_{\mathcal{S}} [b \mathbb{E}_w g(x_{1:i-1}, w) + \log Z_{q'}(x_{1:i-1})] \quad (7)$$

By assumption we have  $Nb\hat{\beta}(g) \geq Nb^2$ , so it remains to show that the second term is upper bounded by  $Nb^2/2$ . Using, as before, the bound  $\log r \leq r - 1$  for every  $r = Z_{q'}(x_{1:i-1}) \geq 0$ , we get that, for every  $i = 1, \dots, N$ :

$$\begin{aligned} \hat{\mathbb{E}}_{\mathcal{S}} [b \mathbb{E}_w g(x_{1:i-1}, w) + \log Z_{q'}(x_{1:i-1})] &\leq \hat{\mathbb{E}}_{\mathcal{S}} [b \mathbb{E}_w g(x_{1:i-1}, w) + Z_{q'}(x_{1:i-1}) - 1] \\ &= \hat{\mathbb{E}}_{\mathcal{S}} [b \mathbb{E}_w g(x_{1:i-1}, w) + \mathbb{E}_w e^{-bg(x_{1:i-1}, w)} - 1] \\ &= \hat{\mathbb{E}}_{\mathcal{S}} \mathbb{E}_w [bg(x_{1:i-1}, w) + e^{-bg(x_{1:i-1}, w)} - 1] \\ &\leq \hat{\mathbb{E}}_{\mathcal{S}} \mathbb{E}_w (bg(x_{1:i-1}, w)/2)^2 \leq \frac{b^2}{2} \end{aligned}$$

where the last inequality follows again from the fact that  $g(x) \in [0, 1]$  for any  $x$ . Therefore, the sum over these  $N$  terms is upper bounded by  $N\frac{b^2}{2}$ , which combined with (7), yields the desired result.  $\square$

## D Proof of Theorem 1

*Proof.* The fact that Algorithm 1 terminates with a distribution  $q$  which is  $\epsilon$ -indistinguishable by  $O_d$  is immediate from the stopping criterion.

Now, for the runtime analysis, note that —by construction— the iterates  $g_t$ ,  $t \in \{0, \dots, T-1\}$  have training advantage  $\hat{\beta}(g_t, \mathcal{S}, q_t) \geq \epsilon$ . Thus, by Lemma 3, the algorithm makes at least  $\frac{N\epsilon^2}{2}$  improvement in each iteration. Therefore, the total number of iterations  $T$  is at most  $\frac{2L_0}{N\epsilon^2}$ , where  $L_0 := \hat{L}(q_0; \mathcal{S})$  is the log-loss of the initial model. Each iteration of Algorithm 1 requires calling  $O_d$  oracle once, evaluating  $\hat{\beta}(\cdot)$  at an  $\mathcal{O}(NmnT_g)$  complexity, and updating each of the  $n$  next-token probabilities of  $q$  for each sequence length  $1, \dots, N$ . Each of these updates involves evaluating  $g$  plus an  $\mathcal{O}(n)$  partition normalization. Putting these together, we conclude that each iteration has  $\mathcal{O}(T_d + NnT_g(m+n))$  complexity.

Combining the the two arguments above, we conclude that Algorithm 1 has a total runtime of  $\mathcal{O}(\frac{1}{\epsilon^2} L_0 (\frac{T_d}{N} + nT_g(m+n)))$ .  $\square$

## E Empirical validation

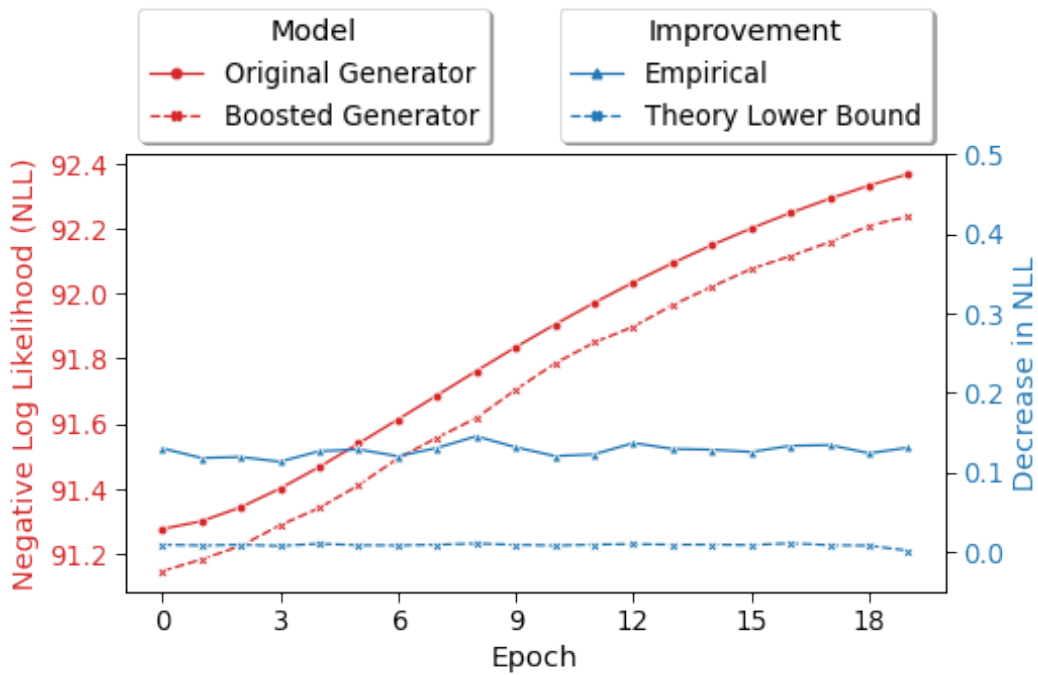

Figure 1: **Empirical Validation of Lemma 3.** For a simple pre-trained SeqGAN model (generator + discriminator), we show that the boosting scheme proposed in that Lemma results in reduced log-loss (NLL) throughout training. Furthermore, the empirical difference between original and boosted models is indeed lower-bounded by the gap predicted by the Lemma.
